# Supplementary material for: Boosting Zn-ion adsorption in cross-linked N/P co-incorporated porous carbon nanosheets for the zinc-ion hybrid capacitor
Source: Royal Society of Chemistry journal article supplement (doi:10.1039/d1ta03501k), 2021-01-01
Supplement: d1ta03501k1.pdf [file d1ta03501k1.pdf]

**Boosting Zn-Ion Adsorption in Cross-Linked N/P Co-Incorporated Porous Carbon Nanosheets for Zinc-Ion Hybrid Capacitor**

Hanfang Zhang<sup>a</sup>, Zhensheng Chen<sup>a</sup>, Yihe Zhang<sup>a,\*</sup>, Zequn Ma<sup>a</sup>, Yingge Zhang<sup>a</sup>, Liqi Bai<sup>a</sup>, Li Sun<sup>a,\*\*</sup>

<sup>a</sup> Beijing Key Laboratory of Materials Utilization of Nonmetallic Minerals and Solid Wastes, National Laboratory of Mineral Materials, School of Materials Science and Technology, China University of Geosciences, Beijing 100083, China.

**Number of pages:** S1-S7;

**Number of figures:** S1-S6;

**Number of tables:** S1-S4.

---

\*Corresponding author. E-mail address: zyh@cugb.edu.cn (Y. Zhang).

\*\*Corresponding author. E-mail address: sunli@cugb.edu.cn (L. Sun).

---

## Figure captions

**Figure S1.** a) and b) SEM images of CNPK.

**Figure S2.** a) Raman spectra and b) XPS survey spectra of CK and CNPK.

**Figure S3.** CV curves at different scan rate of a) CK electrode and b) CNPK electrode.  
c) GCD profiles of the CK electrode.

**Figure S4.** CV curves at different scan rate of a) CK and b) CNPK. c) GCD profiles of aqueous ZHC based on CK cathode.

**Figure S5.** CV curves at different scan rate of a) CNK and b) CPK, GCD profiles of aqueous ZHC based on c) CNK and d) CPK cathode, e) specific capacities at different specific currents and f) Ragone plot of the assembled ZHC based on CNK and CPK.

**Figure S6.** Specific capacities at different specific currents of CNPK based quasi-solid ZHC device.

## Table captions

**Table S1** Pore structure parameters of CK and CNPK.

**Table S2** Contents of C, O, N and P elements in CK and CNPK.

**Table S3** Electrochemical properties comparison of various ZHCs based on different cathodes.

**Table S4** Relative energy value along the reaction pathway of carbon surface with different kinds of N and P.

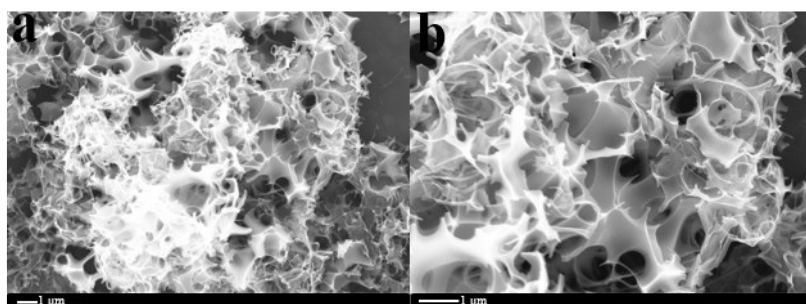

**Figure S1.** a) and b) SEM images of CNPK.

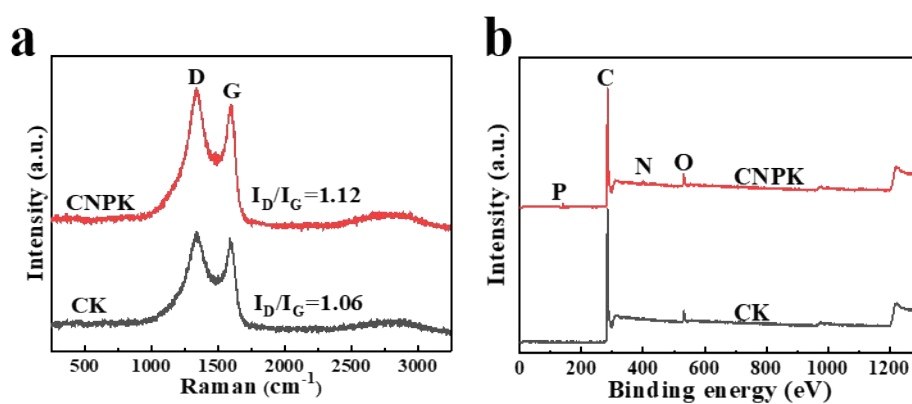

**Figure S2.** a) Raman spectra and b) XPS survey spectra of CK and CNPK.

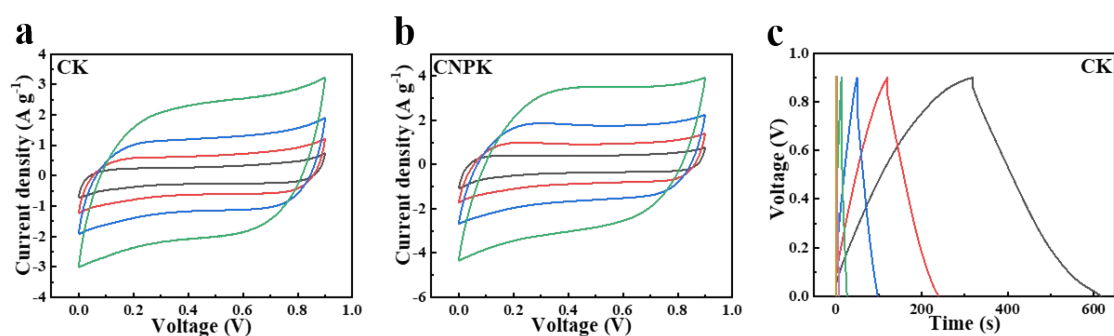

**Figure S3.** CV curves at different scan rate of a) CK electrode and b) CNPK electrode.

c) GCD profiles of the CK electrode.

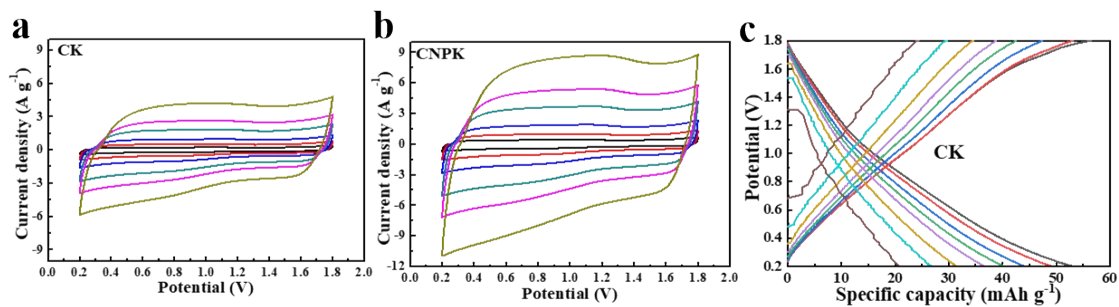

**Figure S4.** CV curves at different scan rate of a) CK and b) CNPK. c) GCD profiles of aqueous ZHC based on CK cathode.

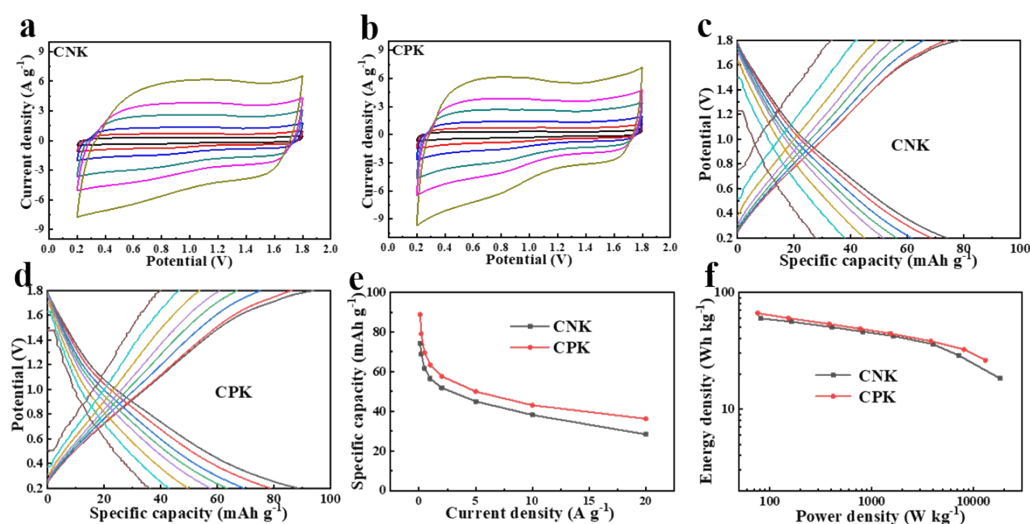

**Figure S5.** CV curves at different scan rate of a) CNK and b) CPK, GCD profiles of aqueous ZHC based on c) CNK and d) CPK cathode, e) specific capacities at different specific currents and f) Ragone plot of the assembled ZHC based on CNK and CPK.

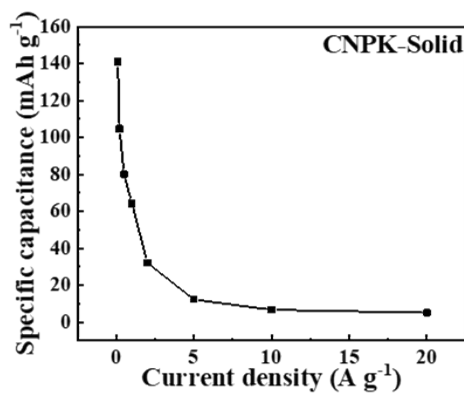

**Figure S6.** Specific capacities at different specific currents of CNPK based quasi-solid ZHC device.

**Table S1** Pore structure parameters of CK and CNPK.

| Samples | D <sub>ap</sub><br>(nm) | S <sub>BET</sub><br>(m <sup>2</sup> g <sup>-1</sup> ) | S <sub>micro</sub><br>(m <sup>2</sup> g <sup>-1</sup> ) | V <sub>t</sub><br>(cm <sup>3</sup> g <sup>-1</sup> ) | V <sub>micro</sub><br>(cm <sup>3</sup> g <sup>-1</sup> ) |
|---------|-------------------------|-------------------------------------------------------|---------------------------------------------------------|------------------------------------------------------|----------------------------------------------------------|
| CK      | 2.34                    | 1644                                                  | 1292                                                    | 0.96                                                 | 0.548                                                    |
| CNPK    | 2.53                    | 2038                                                  | 980                                                     | 1.29                                                 | 0.428                                                    |

**Table S2** Contents of C, O, N and P elements in CK and CNPK.

| Samples | C1s (at. %) | O1s (at. %) | N1s (at. %) | P2p (at. %) |
|---------|-------------|-------------|-------------|-------------|
| CK      | 95.23       | 4.77        | -           | -           |
| CNPK    | 90.81       | 4.43        | 2.62        | 2.14        |

**Table S3** Electrochemical properties comparison of various ZHCs based on different cathodes.

| Material         | Electrolyte                                 | Voltage   | C                                                                                              | CR                        | E     | Ref.        |
|------------------|---------------------------------------------|-----------|------------------------------------------------------------------------------------------------|---------------------------|-------|-------------|
| Activated carbon | ZnSO <sub>4</sub>                           | 0.5-1.8 V | 121 (0.1 A g <sup>-1</sup> )<br>41.0 (20 A g <sup>-1</sup> )                                   | 91% after 10000 cycles    | 84    | 12          |
| Activated carbon | ZnSO <sub>4</sub>                           | 0.5-1.5 V | 72.1 (0.05 A g <sup>-1</sup> )<br>45.0 (0.6 A g <sup>-1</sup> )                                | 100% after 10000 cycles   | 24.9  | 9           |
| Activated carbon | Zn(CF <sub>3</sub> SO <sub>3</sub> )        | 0-1.8 V   | 85 (0.1 A g <sup>-1</sup> )<br>72.0 (1 A g <sup>-1</sup> )<br>65.4 (0.06 A g g <sup>-1</sup> ) | 91% after 20000 cycles    | 52.7  | 18          |
| ZnHCFs           | ZnSO <sub>4</sub>                           | 0.8-1.9 V | <sup>1</sup> )<br>32.3 (0.3 A g <sup>-1</sup> )                                                | -                         | 100   | 37          |
| Natural graphite | Zn(OAc) <sub>2</sub> /choline acetate/water | 0-1.8 V   | 73 (0.2 A g <sup>-1</sup> )                                                                    | 86% after 1000 cycles     | 52.6  | 38          |
| porous carbon    | gelatin/ZnSO <sub>4</sub> gel               | 0.2-1.8 V | 132.7 (0.2 A g <sup>-1</sup> )<br>54.5 (4 A g <sup>-1</sup> )                                  | 87.6% after 10000 cycles  | 82.36 | 20          |
| CNPK             | ZnSO <sub>4</sub>                           | 0.2-1.8   | 103 (0.1 A g <sup>-1</sup> )                                                                   | 101.8% after 10000 cycles | 165.4 | <b>This</b> |

---



---

|    |          |          |                        |                              |          |           |    |             |                                |
|----|----------|----------|------------------------|------------------------------|----------|-----------|----|-------------|--------------------------------|
|    |          |          |                        | 52.0 (20 A g <sup>-1</sup> ) |          |           |    | <b>work</b> |                                |
| C: | Specific | capacity | (mAh g <sup>-1</sup> ) | CR:                          | Capacity | retention | E: | Energy      | density (Wh kg <sup>-1</sup> ) |

---

---

**Table S4** Relative energy value along the reaction pathway of carbon surface with different kinds of N and P.

| Name       | *-OH+Zn <sup>2+</sup> | *-OH(Zn) | *-OZn+H <sup>+</sup> |
|------------|-----------------------|----------|----------------------|
| graphene   | 0                     | -1.3     | 2.06                 |
| Pyridine N | 0                     | -0.21    | 1.16                 |
| Pyrrole N  | 0                     | -0.22    | 1.23                 |
| Graphite N | 0                     | -0.19    | 1.09                 |
| P-C-OH     | 0                     | -0.16    | 0.78                 |
| C-P-OH     | 0                     | -0.33    | 1.28                 |
